# Supplementary material
Source: PubMed Central journal article supplement (PMC6033669)
Supplement: NIHMS961337-supplement-3.pdf [file NIHMS961337-supplement-3.pdf]

## Supplementary Information Guide

The Supplementary Information file contains two documents to support the main manuscript.

1. A description of the E06 antibody is provided for the interested reader to provide the historical importance of this antibody, role in innate immunity and its binding characteristics with detailed descriptions of the epitope it binds. These details should assist the reader in proper interpretation of the E06-scFv role in these studies in neutralizing phosphocholine containing oxidized phospholipids. Relevant references are provided for the interested reader.

2. Supplementary Table 1

Provides a detailed description of the various labeled antibodies used in the FACS characterization of isolated arterial wall cells as described in Methods.
